# Supplementary material for: Normal Values of High-resolution Manometry Parameters With Provocative Maneuvers
Source: PubMed Central journal article supplement — J Neurogastroenterol Motil. 2021 Jul 30;27(3):354–62. doi: 10.5056/jnm20118 (PMC8266507; doi:10.5056/jnm20118), 2021-07-30
Supplement: jnm-27-3-347-supple.pdf [file jnm-27-3-347-supple.pdf]

## Supplementary Material

### Survey on Clinical Practice for Esophageal High-resolution Manometry

Thank you for spending your time in responding to this nationwide survey developed by Dysphagia Research Group Under the Korean Society of Neurogastroenterology and Motility. The purpose of this survey is to understand current practice patterns on esophageal high-resolution manometry (HRM) and to promote the development of standardized study protocol. The results of this survey will be reproduced and used for research purpose only. Please respond to each question and provide a detailed description when necessary.

#### Q1. Institution setup and equipment

Name of institution: \_\_\_\_\_

1-1) Hospital setting:  primary care hospital  secondary care hospital  tertiary care hospital

1-2) Equipment used for HRM:  Given Imaging system  Sandhill Scientific  Medical Measurements Systems

#### Q2. Study indications (multiple answers)

- dysphagia  heartburn  regurgitation  
 refractory gastroesophageal reflux disease  extraesophageal symptoms  
 noncardiac chest pain  belching  before anti-reflux surgery  
 before bariatric surgery  others:

#### Q3. Symptom questionnaires

3-1) Do you utilize specific survey or questionnaires prior to HRM?  yes  no (go to Q4)

3-2) Select the category of questionnaires and write their title (eg, GERD-Q).

- reflux questionnaire:  
 dysphagia questionnaire:  
 quality of life questionnaire:  
 others:

#### Q4. Study protocol and data reporting

4-1) Fasting before HRM:  6 hours  before midnight  others:

4-2) Methods for local pharyngeal anesthesia:  lidocaine jelly  others:

4-3) Do you recommend withdrawal of usual medication that can affect esophageal motility prior to HRM?  yes  no (go to Q4-4)

4-3-1) Select the medication that should be withdrawn before HRM (multiple answers).

- antispasmodics  calcium channel blockers  nitroglycerin  muscle relaxant  opioids  others:

4-3-2) Duration of withdrawal (days or weeks): \_\_\_\_\_

4-4) Study position (multiple answers)

- supine  seated upright  semi-recumbent position (head elevation for 30°)  Trendelenburg position  others:

4-5) Swallow protocols

4-5-1) Consistency (multiple answers)

- wet (eg, saline, half saline, water):  
 viscous (eg, apple sauce):  
 solid (eg, bread):  
 others:

4-5-2) Volume of each swallow: \_\_\_\_\_ mL

4-5-3) Total number of swallows for each consistency: \_\_\_\_\_ times

4-5-4) Interval between swallows: \_\_\_\_\_ seconds

4-6) Do you perform the provocation test?  yes  no (go to Q4-8)

4-6-1) To whom should the provocation test be performed?  all patients  as indicated

4-6-2) Which provocation test do you conduct? (multiple answers)

- multiple rapid swallow  multiple drinking challenge  standardized meal  others:

4-7) Reference pressure:  atmospheric pressure  gastric pressure  others:

4-8) What parameters do you analyze and report? (multiple answers)

- LES length  resting LES pressure  EGJ morphology  EGJ-CI  IRP  
 DCI  distal latency  CFV  bolus transit  intrabolus pressure  
 transition zone defect  UES measurement  pharyngeal swallow  others:

LES, lower esophageal sphincter; EGJ, esophagogastric junction; EGJ-CI, EGJ-contractile integral; IRP, integrated relaxation pressure; DCI, distal contractile integral; CFV, contractile front velocity; UES, upper esophageal sphincter.

This is the end of the survey. Thank you for responding.
